# Supplementary material for: OMIP‐070: NKp46‐Based 27‐Color Phenotyping to Define Natural Killer Cells Isolated From Human Tumor Tissues
Source: PubMed Central journal article supplement — Cytometry A. 2020 Oct 8;97(10):1052–6. doi: 10.1002/cyto.a.24230 (PMC7702032; doi:10.1002/cyto.a.24230), 2020-10-08
Supplement: CYTO-97-1052-s002.pdf [file CYTO-97-1052-s002.pdf]

|    |                                                                                                  |           |
|----|--------------------------------------------------------------------------------------------------|-----------|
| 1  | <b>SUPPLEMENTAL OMIP-070: NKp46-based 27-color panel to</b>                                      |           |
| 2  | <b>define Natural Killer cells isolated from human tumor tissues</b>                             |           |
| 3  | Marie Frutoso, Florian Mair, Martin Prlic                                                        |           |
| 4  | <b>Developmental Strategy</b>                                                                    | <b>2</b>  |
| 5  | <b>1. Panel development</b>                                                                      | 2         |
| 6  | <i>Instrument configuration</i>                                                                  | 2         |
| 7  | <i>Titrations</i>                                                                                | 3         |
| 8  | <i>Panel design guided by spreading error (SE)</i>                                               | 5         |
| 9  | <i>Establishment of the first iteration</i>                                                      | 7         |
| 10 | <b>2. Unambiguous identification of NK cells as a crucial goal for the success of this panel</b> | 9         |
| 11 | <b>3. Definition of the markers of interest to be included in this panel</b>                     | 12        |
| 12 | <i>Activating and inhibitory receptors</i>                                                       | 12        |
| 13 | <i>Maturation and activation</i>                                                                 | 15        |
| 14 | <i>Migration and residency</i>                                                                   | 17        |
| 15 | <i>Other excluded reagents</i>                                                                   | 19        |
| 16 | <b>4. Final remarks for this panel development:</b>                                              | 20        |
| 17 | <i>Collagenase treatment</i>                                                                     | 20        |
| 18 | <i>Fluorescence Minus One controls</i>                                                           | 22        |
| 19 | <i>Compensation</i>                                                                              | 24        |
| 20 | <i>Empty channel</i>                                                                             | 24        |
| 21 | <i>Expected variability between individuals</i>                                                  | 25        |
| 22 | <i>What about T cells?</i>                                                                       | 26        |
| 23 | <b>Material and Methods</b>                                                                      | <b>27</b> |
| 24 | <b>1. Sample preparation</b>                                                                     | 27        |
| 25 | <i>Commercial reagents and materials</i>                                                         | 27        |
| 26 | <i>Prepared Buffers</i>                                                                          | 28        |
| 27 | <i>Method</i>                                                                                    | 28        |
| 28 | <b>2. Staining protocol</b>                                                                      | 30        |
| 29 | <i>Commercial reagents and materials</i>                                                         | 30        |
| 30 | <i>Prepared Buffers</i>                                                                          | 31        |
| 31 | <i>Method</i>                                                                                    | 31        |
| 32 | <b>References</b>                                                                                | <b>36</b> |

## 34 **Developmental Strategy**

35

### 36 **1. Panel development**

37

#### 38 *Instrument configuration*

39 This 27-color panel was developed for a FACSymphony A5 with the configuration specified  
40 in **Online Table 1**. Markers were grouped based on priority. The highest priority was assigned to  
41 assess the viability of the cells. Including a marker of viability is required as dead cells have greater  
42 autofluorescence and increased non-specific binding that can affect the quality of the staining  
43 (1). The L/D fixable blue dead cell stain kit (referred to as UV L/D) was used, since not a lot of  
44 antibodies are available coupled to the AF350 fluorochrome to date.

45

|    | Laser | Power | Name | Mirror | Bandpass | Fluorochrome used |
|----|-------|-------|------|--------|----------|-------------------|
| 1  | 355nm | 65mW  | U395 |        | 379/28   | BUV395            |
| 2  |       |       | U450 | 410LP  | 450/50   | UV L/D            |
| 3  |       |       | U500 | 470LP  | 515/30   | BUV496            |
| 4  |       |       | U570 | 550LP  | 570/30   | BUV563            |
| 5  |       |       | U660 | 635LP  | 660/40   | BUV660            |
| 6  |       |       | U740 | 710LP  | 640/35   | BUV737            |
| 7  |       |       | U780 | 755LP  | 785/62   | BUV805            |
| 8  | 405nm | 200mW | V450 |        | 450/40   | BV421             |
| 9  |       |       | V510 | 505LP  | 515/20   | BV480             |
| 10 |       |       | V570 | 550LP  | 575/25   | BV570             |
| 11 |       |       | V605 | 580LP  | 605/20   | BV605             |
| 12 |       |       | V655 | 630LP  | 660/20   | BV650             |
| 13 |       |       | V710 | 685LP  | 710/40   | BV711             |
| 14 |       |       | V750 | 735LP  | 750/30   | BV750             |
| 15 |       |       | V780 | 770LP  | 785/62   | BV786             |
| 16 | 488nm | 200mW | B515 | 505LP  | 515/20   | FITC              |
| 17 |       |       | B610 | 600LP  | 610/20   | BB630             |
| 18 |       |       | B660 | 635LP  | 660/40   | BB660             |
| 19 |       |       | B710 | 695LP  | 710/50   | BB700             |
| 20 |       |       | B780 | 750LP  | 780/40   | BB790             |
| 21 | 532nm | 200mW | G575 |        | 575/25   | PE                |
| 22 |       |       | G610 | 600LP  | 610/20   | PE-CF594          |
| 23 |       |       | G660 | 635LP  | 660/40   | PE-Cy5            |
| 24 |       |       | G710 | 690LP  | 710/50   | PE-Cy5.5          |
| 25 |       |       | G780 | 750LP  | 780/60   | PE-Cy7            |
| 26 | 628nm | 200mW | R660 |        | 670/30   | eFluor660         |
| 27 |       |       | R710 | 685LP  | 730/45   | AF700             |
| 28 |       |       | R780 | 750LP  | 780/45   | APC-H7            |

60 **Online Table 1: Instrument Configuration**

61 *The BD FACSymphony A5 used for this panel development is equipped with 7 detectors for the 355nm Ultra Violet*  
62 *(UV) laser, 8 detectors for the 405nm violet laser, 5 detectors for both the 488nm blue and 532nm green lasers, and*  
63 *3 detectors for the 628nm red laser. All optical filters are listed together with the fluorochromes used in this*  
64 *manuscript.*

65

66 **Titration**

67 The panel was developed based on cell surface molecules of interest for NK cell  
68 characterization. Different priority levels were assigned regarding the importance of inclusion in  
69 the final panel, as well as the availability of fluorochrome conjugates (2). Before assessing each  
70 new iteration of the panel, all reagents were titrated by at least two-fold dilution series. The

71 **Online Figure 1** depicts the titrations of the antibodies used in the optimized panel.

72

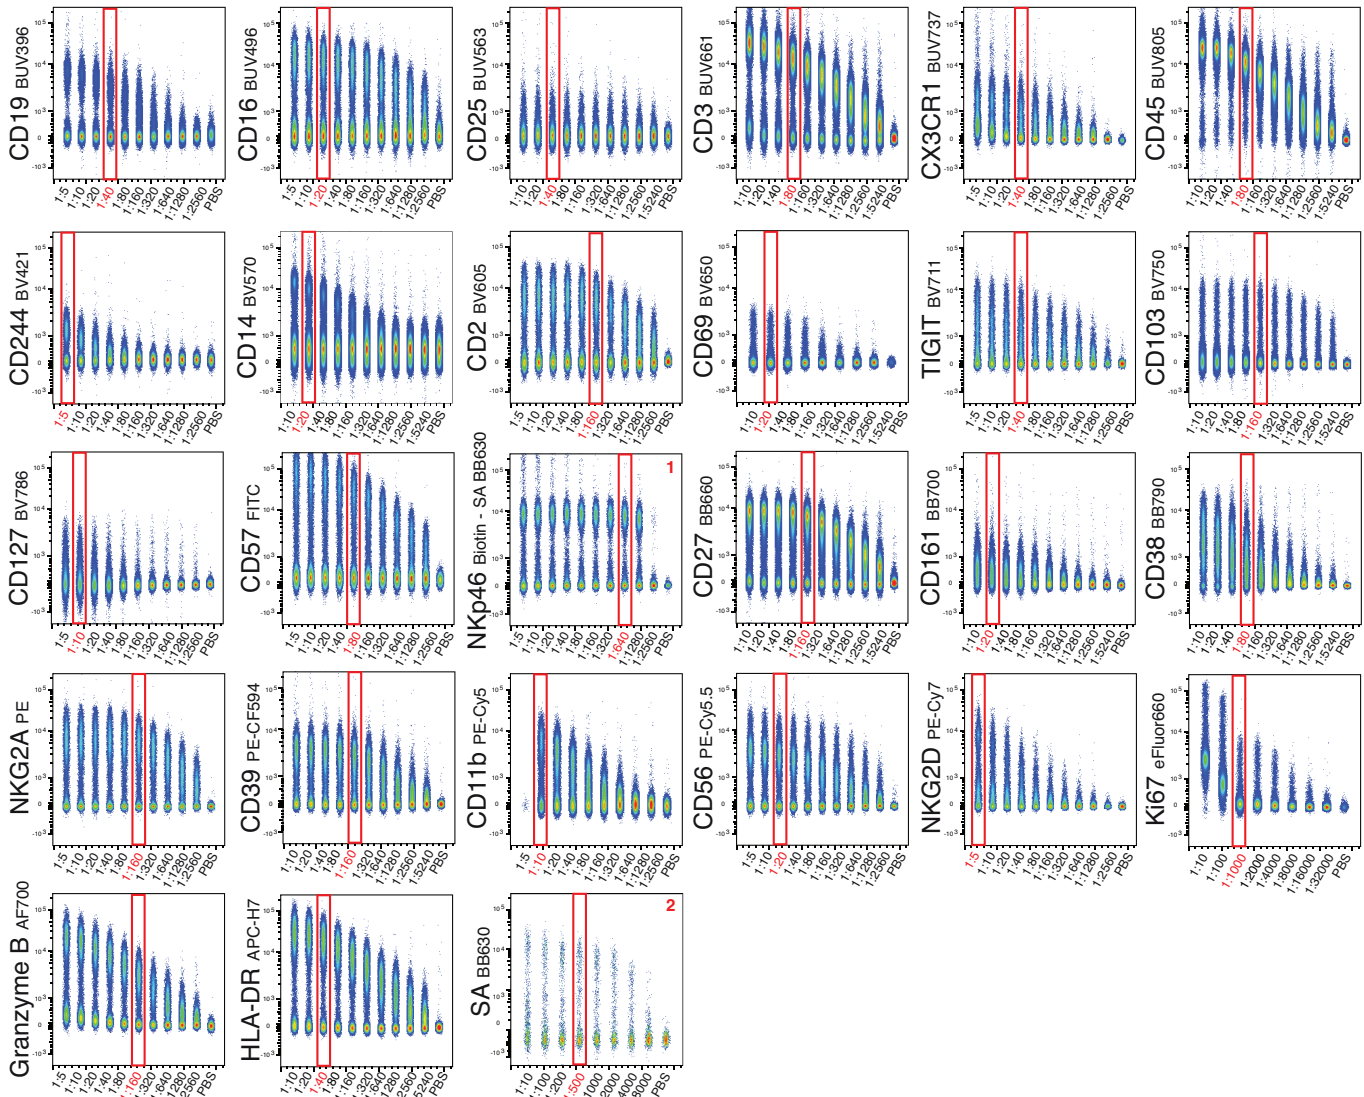

73 **Online Figure 1: Titrations of the antibodies used in the optimized panel**

74 Reagents were titrated using cryopreserved PBMCs from healthy donors, by performing at least 8 2-fold dilution steps  
 75 (specific dilutions are indicated below each plot). Individual .fcs files were concatenated in order to visualize all  
 76 titrations in one single plot. Decreasing antibody-concentrations are arranged along the x axis. “PBS” is referring to  
 77 an unstained sample. The optimal titers used for a given antibody was mostly chosen based on the concentration  
 78 leading to the higher Stain Index (SI) ratio. SI was calculated, using FlowJo 10.6.0, as followed:  $(\text{median}^+ - \text{median}^-) /$   
 79  $((\text{percentile } 84 \text{ of the median of the negative population} - \text{median}^-) / 0.995)$ . For some antibodies without a clearly  
 80 defined positive population, the best titer was chosen based on the near maximal signal without increasing  
 81 background signal. Finally, for some marker (primarily lineage markers), we did not choose the titer with the highest  
 82 SI in order to safe reagent as separation was deemed sufficient and no saturating titer was required. Titrations that were  
 83 selected in this OMIP are highlighted in red. Titrations are given as dilution factors for a final staining volume of 50  $\mu\text{L}$  for  
 84  $2-5 \times 10^6$  cells. **1.** Titration of the NKp46 Biotin. SA BB630 was used at 1:500. **2.** Titration of the SA BB630. NKp46  
 85 Biotin was used at 1:640.

86

87

88 *Panel design guided by spreading error (SE)*

89           Spreading error is the single most relevant contributor to loss of resolution and this panel  
90 was designed using a spill-over spreading error matrix (SSM) to predict problematic combination  
91 of fluorochromes. The SSM generated provides an overview, for a specific instrument and a  
92 specific panel, of the relative contribution of any fluorophore to generate spillover spreading  
93 error in secondary detectors as well as the relative loss of resolution in any secondary detector  
94 due to spillover spreading error collected from all other fluorophores (2-4). Ultimately, the SSM  
95 helps designing a multicolor panel as problematic pairs of fluorochromes can be anticipated with  
96 a high numerical value. Here, we identified the following problematic pairs, both by their high  
97 value in the SSM as well as visual inspection of the spreading error on two-dimensional plots  
98 (data not shown), that could predict a loss of resolution in secondary detectors due to the:

- 99       - Spreading error of the BB 630 fluorochrome into the G610 and V610 detectors
- 100       - Spreading error of the BB 790 fluorochrome into the V780 detector
- 101       - Spreading error of the PE-CF594 fluorochrome into the B610 detector
- 102       - Spreading error of the PE-Cy5.5 fluorochrome in the B710 detector
- 103       - Spreading error of the BUV661 fluorochrome in the R660 detector
- 104       - Spreading error of the BV650 fluorochrome in the R660 and U660 detectors

105

106           Of note, the final SSM was generated with the antibodies used in the optimized panel (**Online**  
107 **Table 2**), and is displayed in the **Online Figure 2**.

| Specificity  | Clone      | Fluorochrome | Vendor             | Catalog number | Titration |
|--------------|------------|--------------|--------------------|----------------|-----------|
| Dead cells   | UV         | Blue         | Invitrogen         | L34962         | 1:500     |
| CD45         | HI30       | BUV805       | BD                 | 564914         | 1:80      |
| CD14         | M5E2       | BV570        | BioLegend          | 301832         | 1:20      |
| CD19         | SJ250-C1   | BUV395       | BD                 | 563549         | 1:40      |
| CD3          | UCHT1      | BUV661       | BD                 | 565065         | 1:80      |
| CD127        | HIL-7R-M21 | BV786        | BD                 | 563324         | 1:10      |
| HLA-DR       | G46.6      | APC-H7       | BD                 | 641393         | 1:40      |
| CD16         | 3G8        | BUV496       | BD                 | 564653         | 1:40      |
| NKp46        | 9E2        | Biotin       | BioLegend          | 331906         | 1:640     |
| Streptavidin |            | BB630        | BD custom antibody | 624294         | 1:500     |
| NKG2D        | 1D11       | PE-Cy7       | BD                 | 562365         | 1:5       |
| CD244        | 2-69       | BV421        | BD                 | 565750         | 1:5       |
| CD2          | RPA-2.10   | BV605        | BioLegend          | 300224         | 1:160     |
| NKG2A        | REA110     | PE           | Miltenyi           | 130-113-566    | 1:160     |
| CD161        | DX12       | BB700        | BD                 | 745791         | 1:20      |
| TIGIT        | 741182     | BV711        | BD                 | 747839         | 1:80      |
| CD69         | FN50       | BV650        | BioLegend          | 310933         | 1:20      |
| CD39         | TU66       | PE-CF594     | BD                 | 563678         | 1:160     |
| CD57         | NK-1       | FITC         | BD                 | 555619         | 1:80      |
| CD27         | M-T271     | BB660        | BD custom antibody | 624295         | 1:160     |
| CD11b        | ICRF44     | PE-Cy5       | BD                 | 555389         | 1:10      |
| CD38         | HIT2       | BB-790-P     | BD custom antibody | 624896         | 1:80      |
| CX3CR1       | 2A9-1      | BUV737       | BD                 | 749355         | 1:40      |
| CD103        | Ber-ACT8   | BV750        | BD                 | 747099         | 1:160     |
| Ki67         | Sola15     | eFluor660    | eBiosciences       | 50-5698-80     | 1:1000    |
| GranzymeB    | QA16A2     | AF700        | BioLegend          | 372222         | 1:160     |
| CD25         | 2A3        | BUV563       | BD                 | 565699         | 1:40      |
| CD56         | CMSSB      | PECy5.5      | ThermoFisher       | 35-0567-41     | 1:20      |

108  
109  
110

**Online Table 2: Antibodies used in the optimized panel**



|          | Iteration 1        | Iteration 2              | Iteration 3           | Iteration 4             | Iteration 5               | Iteration 6         | OPTIMIZED PANEL    |
|----------|--------------------|--------------------------|-----------------------|-------------------------|---------------------------|---------------------|--------------------|
| BUV395   | CD4 (RPA-T4)       | CD4 (RPA-T4)             | CD4 (RPA-T4)          | <b>CD4 (RPA-T4)</b>     | <b>CD25 (2A3)</b>         | CD19 (SJ25-C1)      | CD19 (SJ25-C1)     |
| UV L/D   | L/D                | L/D                      | L/D                   | L/D                     | L/D                       | L/D                 | L/D                |
| BUV496   | CD16 (3G8)         | CD16 (3G8)               | CD16 (3G8)            | CD16 (3G8)              | CD16 (3G8)                | CD16 (3G8)          | CD16 (3G8)         |
| BUV563   | CD56 (NCAM16.2)    | CD56 (NCAM16.2)          | CD56 (NCAM16.2)       | CD56 (NCAM16.2)         | <b>CD56 (NCAM16.2)</b>    | <b>CD25 (2A3)</b>   | CD25 (2A3)         |
| BUV661   | CD3 (UCHT1)        | CD3 (UCHT1)              | CD3 (UCHT1)           | CD3 (UCHT1)             | CD3 (UCHT1)               | CD3 (UCHT1)         | CD3 (UCHT1)        |
| BUV737   |                    |                          | <b>CX3CR1 (2A9-1)</b> | CX3CR1 (2A9-1)          | CX3CR1 (2A9-1)            | CX3CR1 (2A9-1)      | CX3CR1 (2A9-1)     |
| BUV805   | CD45(HI30)         | CD45(HI30)               | CD45(HI30)            | CD45(HI30)              | CD45(HI30)                | CD45(HI30)          | CD45(HI30)         |
| BV421    | CD122 (Mik-b3)     | CD122 (Mik-b3)           | CD122 (Mik-b3)        | <b>CD122 (Mik-b3)</b>   | <b>CD244 (2-69)</b>       | CD244 BV421 (2-69)  | CD244 BV421 (2-69) |
| BV480    | CD161 (DX12)       | <b>CD161 (DX12)</b>      |                       |                         |                           |                     |                    |
| BV570    |                    | <b>CD14 (M5E2) BV570</b> | CD14 (M5E2)           | CD14 (M5E2)             | CD14 (M5E2)               | CD14 (M5E2)         | CD14 (M5E2)        |
| BV605    | NKG2A (131411)     | NKG2A (131411)           | <b>NKG2A (131411)</b> | <b>NKp46 BV605</b>      | <b>CD2 (RPA-2.10)</b>     | CD2 (RPA-2.10)      | CD2 (RPA-2.10)     |
| BV650    | Tim3 (7D3)         | Tim3 (7D3)               | Tim3 (7D3)            | Tim3 (7D3)              | Tim3 (7D3)                | <b>Tim3 (7D3)</b>   | <b>CD69 (FN50)</b> |
| BV711    | NKp46 (9E2)        | <b>NKp46 (9E2)</b>       | <b>TIGIT (741182)</b> | TIGIT (741182)          | TIGIT (741182)            | TIGIT (741182)      | TIGIT (741182)     |
| BV750    | CD103 (Ber-ACT8)   | CD103 (Ber-ACT8)         | CD103 (Ber-ACT8)      | CD103 (Ber-ACT8)        | CD103 (Ber-ACT8)          | CD103 (Ber-ACT8)    | CD103 (Ber-ACT8)   |
| BV785    | CD127 (HIL-7R-M21) | CD127 (HIL-7R-M21)       | CD127 (HIL-7R-M21)    | CD127 (HIL-7R-M21)      | CD127 (HIL-7R-M21)        | CD127 (HIL-7R-M21)  | CD127 (HIL-7R-M21) |
| BB515    | CD57 (NK-1)        | CD57 (NK-1)              | CD57 (NK-1)           | CD57 (NK-1)             | CD57 (NK-1) FITC          | CD57 (NK-1) FITC    | CD57 (NK-1) FITC   |
| BB630    |                    |                          | <b>NKp46 (9E2)</b>    | <b>NKG2A (REA110)</b>   | NKp46 (9E2)               | NKp46 (9E2)         | NKp46 (9E2)        |
| BB660    | <b>PD-1 (MIH4)</b> |                          | <b>CD27 (M-T271)</b>  | CD27 (M-T271)           | CD27 (M-T271)             | CD27 (M-T271)       | CD27 (M-T271)      |
| BB700    | NKG2D (1D11)       | <b>NKG2D (1D11)</b>      | <b>CD161 (DX12)</b>   | CD161 (DX12)            | CD161 (DX12)              | CD161 (DX12)        | CD161 (DX12)       |
| BB790    | TIGIT (741182)     | <b>TIGIT (741182)</b>    | <b>CD38 (HIT2)</b>    | CD38 (HIT2)             | CD38 (HIT2)               | CD38 (HIT2)         | CD38 (HIT2)        |
| PE       | CD244 (2-69)       | CD244 (2-69)             | CD244 (2-69)          | <b>CD244 (2-69)</b>     | <b>NKG2A (REA110)</b>     | NKG2A (REA110)      | NKG2A (REA110)     |
| PE-CF594 |                    | <b>PD-1 (EH12)</b>       | PD-1 (EH12)           | PD-1 (EH12)             | PD-1 (EH12)               | <b>PD-1 (EH12)</b>  | <b>CD39 (TU66)</b> |
| PE-Cy5   | CD11b (ICRF44)     | CD11b (ICRF44)           | CD11b (ICRF44)        | CD11b (ICRF44)          | CD11b (ICRF44)            | CD11b (ICRF44)      | CD11b (ICRF44)     |
| PE-Cy5.5 | CD19 (SJ25-C1)     | CD19 (SJ25-C1)           | CD19 (SJ25-C1)        | CD19 (SJ25-C1)          | CD19 (SJ25-C1)            | <b>CD56 (CMSSB)</b> | CD56 (CMSSB)       |
|          | <b>CD14 (TuK4)</b> |                          |                       |                         |                           |                     |                    |
| PE-Cy7   | CX3CR1 (2A9-1)     | <b>CX3CR1 (2A9-1)</b>    | <b>NKG2D (1D11)</b>   | NKG2D (1D11)            | NKG2D (1D11) PE-Cy7       | NKG2D (1D11)        | NKG2D (1D11)       |
| AF647    | Ki67 (Sola15)      | Ki67 (Sola15)            | Ki67 (Sola15)         | Ki67 (Sola15)           | Ki67 (Sola15)             | Ki67 (Sola15)       | Ki67 (Sola15)      |
| AF700    | GranzymeB (GB11)   | GranzymeB (GB11)         | GranzymeB (GB11)      | <b>GranzymeB (GB11)</b> | <b>GranzymeB (QA16A2)</b> | GranzymeB (QA16A2)  | GranzymeB (QA16A2) |
| APC-H7   | HLA-DR (G46.6)     | HLA-DR (G46.6)           | HLA-DR (G46.6)        | HLA-DR (G46.6)          | HLA-DR (G46.6)            | HLA-DR (G46.6)      | HLA-DR (G46.6)     |

|          |                                                                                                               |
|----------|---------------------------------------------------------------------------------------------------------------|
| Antibody | Orange bold writing: antibodies that have to be used with another fluorochrome / clone for the next iteration |
| Antibody | Red bold writing: antibodies that are going to be removed for the next iteration                              |
| Antibody | Blue filling: antibodies that have been added compare to the previous iteration                               |
| Antibody | Orange filling: antibodies which have changed fluorochrome or clone compare to the previous iteration         |

125  
126  
127  
128  
129  
130  
131  
132

### Online Table 3: Toward the 27-color optimized panel

This table outlines the evolution of the panel. Each column represents one tested panel. Orange bold writing indicates that the antibodies were used with a different fluorochrome or clone in the next iteration. Red bold writing indicates that the antibodies were removed in the next iteration. Orange filling highlights antibodies, which were changed to different fluorochrome or clone compared to the previous iteration. Blue filling highlights antibodies that have been added compared to the previous iteration.

133  
134  
135  
136  
137

For the first iteration, a “double dump” channel was assigned to the PE-Cy5.5 channel in order to discard at the same time B cells (CD19) and monocytes (CD14). However, in order to be able to enumerate B cells and monocytes separately, for the rest of the panel development, each marker was assigned to a separate fluorochrome. Tested antibodies that were excluded after each new iteration are listed in the **Online Table 4** along with the explanation for their removal.



| Specificity | Fluorochrome      | Clone    | Reason                                                                                                                                                                                                                                                                             |
|-------------|-------------------|----------|------------------------------------------------------------------------------------------------------------------------------------------------------------------------------------------------------------------------------------------------------------------------------------|
| CD14        | PE-Cy5.5          | TuK4     | "Double dump" channel prevented the enumeration of B cells and monocytes separately. CD14 was switched to BV570                                                                                                                                                                    |
| PD-1        | BB660             | MIH4     | Not great signal linked to the spreading error from CD14 and CD19 PE-Cy5.5 into the B660 detector. PD-1 was used with a different clone and switched to PE-CF594                                                                                                                   |
| CD161       | BV570             | BV480    | Great signal but, to free up V510 detector. CD161 was switched to BB660                                                                                                                                                                                                            |
| NKG2D       | BB700             | 1D11     | NKG2D BB700 induced a lot of spreading error in different detectors as G575, G660, R660, R710 and U660. But most of all, lot of spreading error in the B710 detector which resulted in a bad signal for NKp46 BV711. NKG2D was switched to PE-Cy7                                  |
| NKp46       | BV711             | 9E2      | Bad separation between positive and negative cells, lot of spreading error coming from NKG2D BB700 and CD11b PE-Cy5. Moreover, NKp46 BV711 induced a lot of spreading error in the B710, G710 and R710 detectors. NKp46 was switched to BB630 (using a biotin conjugated antibody) |
| CX3CR1      | PE-Cy7            | 2A9-1    | Great separation but induced a lot of spreading error in the B780 detector. CX3CR1 was switched to BUV737                                                                                                                                                                          |
| TIGIT       | BB790             | 741182   | Great signal but TIGIT was switched to BV711 in order to use a more frequently used marker coupled to the BB790 fluorochrome                                                                                                                                                       |
| NKG2A       | BV605             | 131411   | Bad separation between positive and negative cells and spreading error coming from NKp46 Biotin SA BB630 in the V610 detector. NKG2A was used with a different clone (REA110) and moved to BB630 (using a biotin conjugated antibody)                                              |
| NKG2A       | Biotin - SA BB630 | REA110   | Great separation between positive and negative cells. However, NKp46 had the highest priority and had a better separation using this Biotin - SA BB630 combination. NKG2A was moved to PE.                                                                                         |
| NKp46       | BV605             | 9E2      | Separation less optimal compared to the biotin - SA BB630 combination. NKp46 was moved again to BB630 (using a biotin conjugated antibody)                                                                                                                                         |
| CD4         | BUV395            | RPA-T4   | Great separation but not really informative for this panel. CD4 was definitively removed                                                                                                                                                                                           |
| CD122       | BV421             | Mik-b3   | Great separation but not really informative for this panel. In the different tested samples, all NK cells express CD122. CD122 was definitively removed                                                                                                                            |
| CD244       | PE                | 2-69     | Great separation. However, as NKG2A was used with the PE fluorochrome, CD244 was switched to BV421 that gave a comparable brightness.                                                                                                                                              |
| Granzyme B  | AF700             | GB11     | Great separation, but to obtain a consistent staining between samples, Granzyme B was used with a different clone                                                                                                                                                                  |
| CD25        | BUV395            | 2A3      | Spreading error from CD16 BUV496 in the U395 detector prevented studying the expression of CD25 among NK cells. CD25 was switched to BUV563.                                                                                                                                       |
| CD56        | BUV563            | NCAM16.2 | Really great separation but not really useful to develop the immunophenotyping of NK cells in tissues. As CD25 was moved to BUV563, CD56 was moved to PE-Cy5.5                                                                                                                     |
| CD19        | PE-Cy5.5          | SI25-C1  | Really great separation but as CD56 was moved to PE-Cy5.5, CD19 was switched to BUV395                                                                                                                                                                                             |
| Tim3        | BV650             | 7D3      | Great separation to observe Tim3 expression among circulating NK cells. However, Tim3 was collagenase-sensitive which prevented to clearly study the differential expression in tissues. Tim3 was definitively removed                                                             |
| PD-1        | PE-CF594          | EH12     | Great separation. However, we did not observe PD-1 expression by NK cells. PD-1 was definitively removed                                                                                                                                                                           |

138  
139  
140  
141

**Online Table 4: Tested and excluded reagents**

*This table recapitulates the motives for excluding a given antibody during the panel development*

142 **2. Unambiguous identification of NK cells as a crucial goal for the success of this**  
143 **panel**

144

145 One of the main goals for this panel was to find a strategy that would allow for  
146 unambiguous NK cell characterization of both human peripheral blood NK cells and NK cells in  
147 tumor tissue. After we observed consistently that CD56 expression was impaired by collagenase

148 digestion in tumor tissue samples (**Figure 1 main manuscript**), it became clear that another  
149 marker will be required to discriminate NK cells. NKp46, a member of the Natural Cytotoxicity  
150 Receptor (NCR) family (also named NCR1 or CD335), was described as being expressed by all NK  
151 cells and even a good candidate to discriminate NK cells across species (6,7). Furthermore, as  
152 shown in the **Online Figure 3**, we believe that our new NKp46-gating strategy enabled to capture  
153 all known NK cell subsets.  
154

**PBMC from healthy donor, Live, CD45<sup>+</sup> CD14<sup>-</sup> CD19<sup>-</sup> CD3<sup>+</sup> CD127<sup>-</sup> HLA-DR<sup>+</sup>**

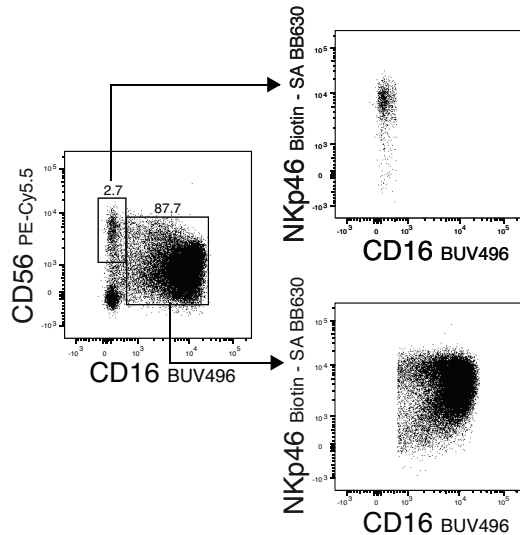

155  
156 **Online Figure 3: NKp46 vs CD16 distribution among the CD56<sup>bright</sup> CD16<sup>-</sup> and CD56<sup>dim</sup> CD16<sup>+</sup> NK cell subsets.**  
157 Cryopreserved PBMCs from one healthy donor were stained with the optimized panel and dot plots are showing the  
158 distribution of NKp46 vs CD16 in comparison with the known NK cell subsets.  
159

160 We used clone 9E2 as it has already been shown to efficiently stain NK cells from both  
161 human peripheral blood and different murine organs (8,9). Three different fluorochromes for  
162 NKp46 were tested: BV711, BV605, and Biotin combined with Streptavidin (SA) BB630. NKp46  
163 BV711 gave a poor signal of the positive population. Moreover, in the first two iterations of the  
164 panel development, the V710 detector received a lot of spreading error from both NKG2D BB700

165 and CD11b PE-Cy5 leading to an unsatisfactory signal. NKp46 BV605 gave a better signal for the  
 166 positive population but the separation between the positive and the negative population was  
 167 less optimal compared to the NKp46 Biotin. The titrations for these three antibodies are shown  
 168 in **Online Figure 4** along with the bivariate dot plots showing the relative density population of  
 169 NK cells along the two parameters CD16 and the different NKp46 tested. These last dot plots  
 170 indicate that NKp46 Biotin – SA BB630 is a perfect fit for the requirement of this panel.  
 171 Importantly, we tested both the direct conjugate NKp46 BB630 and the combination NKp46  
 172 Biotin – SA BB630 and chose to keep the combination NKp46 Biotin – SA BB630 as it had a  
 173 superior resolution (data not shown).

174

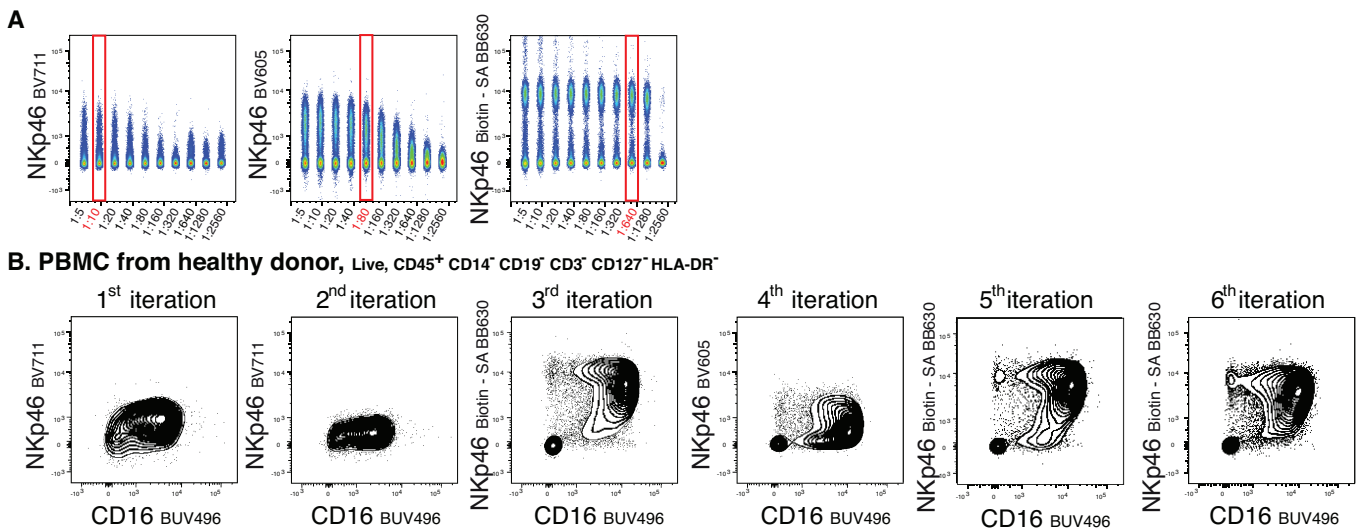

175 **Online Figure 4: Different tested NKp46.**

176 **A.** Dot plots representing the titration of NKp46 with different fluorochromes. Titrations were assessed as described  
 177 in Online Figure 1 **B.** Cryopreserved PBMCs from one healthy donor were stained with the different panels (described  
 178 in Online Table 3). Dot plots represent the NK cell populations along the two parameters CD16 and NKp46 for each  
 179 designed iteration.

181

182

183 **3. Definition of the markers of interest to be included in this panel**

184

185 After defining NKp46 as the main marker used to identify NK cells in tissues, the second  
186 priority was given to the inclusion of targets to assess the functional potential of all NK cell  
187 populations. Importantly, in the following description each marker of the panel is assigned to one  
188 function. However, one should keep in mind that depending on the environment, these included  
189 markers could possess different functions and are not restricted to the one described in the  
190 following sections. However, together, these markers should help in identifying changes within  
191 the NK cell compartment.

192

193 *Activating and inhibitory receptors*

194

195 First, NK cell activation is regulated by a broad family of activating and inhibitory  
196 receptors. NK cells have to integrate signals from these multiple receptors in order to sense their  
197 environment and respond appropriately.

198

199 *Activating receptors:*

200 NKp46 was already included as a critical marker to discriminate NK cells.

201 CD244 (2B4), a member of the Signaling Lymphocyte Activation Molecule (SLAM) family,  
202 was included as it has been shown to be a potential target for immunotherapy. Indeed, CD244's  
203 possible dual functionality being both activating under normal conditions or inhibitory in the  
204 context of the tumor microenvironment (10) is intriguing. CD244 was first tested with clone 2-

205 69, coupled to the PE fluorochrome, which gave a great separation between positive and  
206 negative population. However, during the panel development we have moved the NKG2A  
207 inhibitory receptor to the PE fluorochrome, which has led us to use CD244 with another  
208 fluorochrome. As CD244 is dimly expressed, it required a fluorochrome with a comparable  
209 brightness compared to PE. As, BV421 is a typically bright fluorophore with a comparable  
210 brightness compared to the PE fluorochrome, we have moved CD244 to this fluorochrome.  
211 Moreover, it was a great option as it did not receive a lot of spreading error from other  
212 fluorochromes. Finally, it was an available option as we had decided to remove CD122-BV421  
213 from the panel.

214 CD2, a cell adhesion molecule, was also included as another activating receptor. CD2 has  
215 been shown to be relevant for the co-activation of NK cells as well as the formation of a memory  
216 subset (11,12). The RPA-2.10 clone was used as it has been successfully tested in a previously  
217 published OMIP (13). When we titrated CD2, we noticed that it was highly expressed by NK cells.  
218 We considered that this high CD2 signal could be used with a detector receiving spreading error.  
219 Given the known spreading error from the BB630 fluorochrome into the V610 detector (see  
220 below for NKG2A), we decided to insert CD2 coupled to BV605 which resulted in a great signal  
221 with minimal spill-over or spread issues.

222

### 223 Inhibitory receptors:

224 The inhibitory receptors include the C-type lectin family (NKG2A, CD161) and the killer-  
225 cell immunoglobulin-like receptor family (KIR). NKG2A and CD161 were both included in this  
226 panel. In addition to its role as an inhibitory receptor, NKG2A has been proposed as a biomarker

227 to distinguish a continuous differentiation process of CD56<sup>dim</sup> NK cells, from a NKG2A<sup>+</sup>KIR<sup>-</sup>CD57<sup>-</sup>  
228 to a NKG2A<sup>-</sup>KIR<sup>+</sup>CD57<sup>+</sup> CD56<sup>dim</sup> NK cell phenotype (14), and is, as such, an interesting marker to  
229 include in this panel. NKG2A was first tested with the clone 131411 coupled to the BV605  
230 fluorochrome. As NKG2A is highly expressed by NK cells (15), spreading error in the V610 detector  
231 from the BB630 fluorochrome should not be an issue. However, we did not obtain optimal  
232 staining of the positive population with the 131411 clone. Moreover, as anticipated, a spreading  
233 error from the BB630 fluorochrome into the V610 detector was observed which led us to change  
234 the NKG2A clone (Miltenyi clone REA110) and to move this antibody to the B610 channel using a  
235 biotinylated antibody linked to the SA BB630. This is the reason why NKp46 was moved to the  
236 BV605 fluorochrome in the 4<sup>th</sup> iteration. This setting led to a great staining of NKG2A. However,  
237 the amplification of the signal of the NKp46 BV605 was less convincing compare to the Biotin -  
238 SA BB630 combination tested in the third iteration. As it appeared that NKG2A staining issue was  
239 more related to the clone than the fluorochrome, NKp46 was moved back to the B610 channel.  
240 NKG2A was used coupled to the PE fluorochrome in the 5<sup>th</sup> iteration and yielded a good result  
241 for the staining of the positive fraction as well as the separation between the positive and the  
242 negative populations.

243 CD161 inhibitory receptor expression has been linked to NK cell cytokine-responsiveness  
244 and blocking the interaction with its LLT1 ligand has been shown to increase NK cell cytotoxicity  
245 against breast cancer cells (16), which make this marker a good candidate to include in our panel.  
246 CD161 clone DX12 BV480 was first tested but was then moved to the BB700 fluorochrome, which  
247 enabled to free up V510 for autofluorescence exclusion.

248 We then tested antibodies against proteins with inhibitory properties such as TIGIT (17),  
249 PD-1 and Tim3 (18). TIGIT BB790 (clone 741182) was first tested and resulted in a good staining.  
250 However, in order to be able to use CD38 BB790, more frequently used in the laboratory, TIGIT  
251 was moved to the BV711 fluorochrome.

252 Importantly, the two other inhibitory checkpoints tested in this panel (Tim3 and PD-1)  
253 were eventually removed from the optimized panel. Detection of Tim3 expression was sensitive  
254 to collagenase treatment, and, in line with a recent publication (19), we also did not observe PD-  
255 1 expression on NK cells isolated from different tumor samples. We considered that the lack of  
256 detection could also be specific for the anti-PD-1 clone used in the study. We tested two different  
257 clones (MIH4 and EH12) with the same negative result. A recent study reported that only the  
258 PD.1.3.1.3 clone was able to efficiently separate the PD-1<sup>+</sup> from the PD-1<sup>-</sup> NK cells (20) . However,  
259 this specific clone is not widely available yet with a limited choice of fluorochromes. This has led  
260 us to remove this antibody from the optimized panel.

261

### 262 *Maturation and activation*

263 Since immune activation, maturation and differentiation are important aspects in tumor  
264 immunology, some markers used to delineate these NK cell states were added to this panel.

265

### 266 Maturation

267 Since they have been shown to define NK cell maturation in different contexts, CD11b,  
268 CD27 and CD57 antibodies were included in this panel (7,14,21). Because of their availability in  
269 the laboratory, CD57 clone NK-1 coupled to the FITC fluorochrome, CD11b clone IRCF44 coupled

270 to the PE-Cy5 fluorochrome and CD27 clone M-T271 coupled to the BB660 fluorochrome, were  
271 tested in the first panel. Each of them demonstrated a clear separation of positive and negative  
272 populations within CD45<sup>+</sup> cells and were kept the same along process optimization. CD27  
273 expression among lineage<sup>-</sup> NK cells was low, however, as variation in its expression has been  
274 observed between tissue samples, CD27 was kept in the panel and could be useful for in-depth  
275 definition of NK cell subsets.

276

### 277 Activation

278 First, CD56 was kept in the panel as a phenotypic marker of activation (22). Importantly,  
279 although detection of CD56 expression was shown to be decreased by collagenase treatment,  
280 the comparison of its expression between two types of tissues could still be informative.  
281 Moreover, as CD56 possesses a major role in distinguishing NK cell subsets within the blood,  
282 keeping this marker would still allow for subsetting NK cells within the peripheral blood using the  
283 common strategy of CD56<sup>bright</sup> CD16<sup>neg</sup> or CD56<sup>dim</sup> CD16<sup>+</sup> cells to ensure that new studies can be  
284 compared with previous studies.

285 CD56 clone NCAM-16.2 was first tested coupled to the BUV563 fluorochrome and yielded  
286 an excellent separation of expression. However, during the optimization process, CD56 was  
287 moved to the PECy5.5 fluorochrome, which still allowed for a clear separation of the negative  
288 and positive populations. This modification was due to the inclusion, in the 5<sup>th</sup> iteration, of CD25  
289 BUV395, as another marker of activation (23-26). In the 4<sup>th</sup> iteration, a spreading error from CD16  
290 BUV496 in the U395 detector was observed obscuring the expression of CD25. To fix this issue,  
291 CD25 was moved to the U570 detector, with the BUV563 fluorochrome, that received moderate



292 spreading error from other fluorochromes and which resulted in well separated CD25  
293 populations. Because of this change CD56 was moved to the PE-Cy5.5 channel.

294 CD38 was included as a marker of NK cell activation. A recent study linked CD38  
295 expression to NK cell cytotoxic activity against tumor cells (27) highlighting the importance of  
296 including this marker.

297 Finally, granzyme B and Ki67 were also included in this panel as classical markers of  
298 cytotoxic potential and the ability to proliferate, respectively. Granzyme B coupled to AF700 and  
299 Ki67 to eFluor660 were first tested and were kept during panel development. However, we made  
300 one modification for granzyme B and switched from the GB11 clone to the QA16A2 clone. The  
301 main reason was the sporadic (and seemingly random) shift of the negative population from the  
302 blood to a higher staining intensity compared to the negative population of the tumor. In  
303 OMIP60, authors have compared the two clones GB11 and QA16A2 and reported a similar  
304 staining efficiency (28). Since clone QA16A2 was also available coupled to AF700, we used it from  
305 here on for our panel development. However, random shifts of the negative population from the  
306 blood to a higher staining intensity were still observed with clone QA16A2.

307

### 308 *Migration and residency*

309 Lastly, as the goal of this OMIP is to define NK cell populations in human tumor tissues  
310 and peripheral blood, migration and residency markers were included in this panel. CD103 and  
311 CD69 are classical markers of tissue-resident memory T cells (29). Since they have also been  
312 shown to be expressed by tissue-infiltrating NK cells (30-32), they were both included in this  
313 panel. CX3CR1 was also included as its expression at the surface of NK cells is modulated in tumor

314 tissues (33,34). CX3CR1 was first tested coupled to the PE-Cy7 fluorochrome, which induced a lot  
315 of spreading error in the B780 detector. As we wanted to include CD38 BB790 that is not highly  
316 expressed by NK cells, we needed to reduce this spreading error, and this is the reason why  
317 CX3CR1 was moved to the BUV737 channel. With this fluorochrome, it displayed a clear  
318 separation between positive and negative population.

319 CD39 was also included as a tissue residency marker. CD39 could be a marker of chronic  
320 antigen stimulation, which could be the case within a tumor tissue. CD39 is of interest as a  
321 therapeutic target to prevent adenosine-triggered immune-suppressive effect (35). CD39 was  
322 used coupled to the PE-CF594 where a moderate spreading error from the NKp46 Biotin – BB630  
323 into the G610 detector was detected. We used CD3<sup>+</sup> T cells that expressed CD39 (35), to set the  
324 threshold of CD39 positivity (**Online Figure 5**). Given that we could identify cells with high  
325 expression of CD39 and given the lack of a better alternative approach, we settled with this  
326 combination.

327 As a caveat, this combination would inevitably prevent us to study a possible intermediate  
328 expression of CD39 by NK cells. However, to date, there are no publications regarding the  
329 expression patterns of CD39 on human NK cells. In our analyzed tissues, we were able to see  
330 increased expression of CD39 by infiltrating NK cells, so we decided to keep CD39 PE-CF594  
331 (**Figure 1 main manuscript**).

332

## Tumor tissue

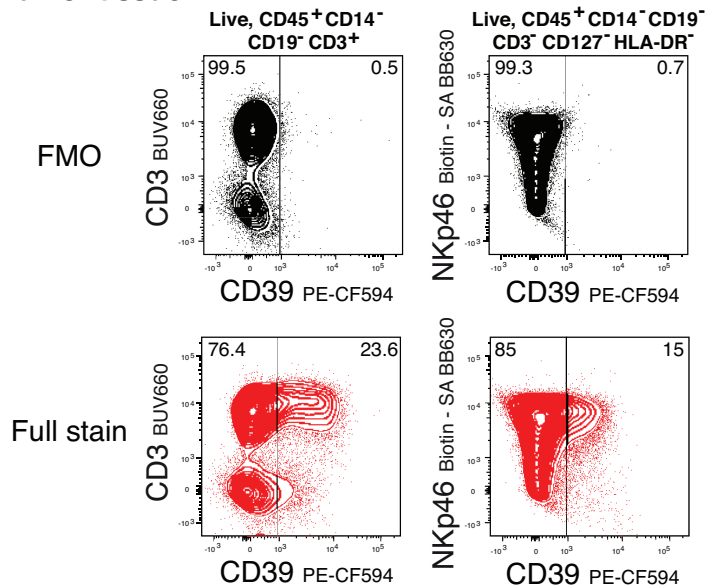

333  
334  
335  
336  
337  
338  
339

### **Online Figure 5: Threshold of CD39 positivity**

Single FMO for the CD39 marker was performed on one tumor tissue. Upper black dot plots represent the FMO expression and lower red dot plots represent the corresponding full staining for the lineage-gated CD3<sup>+</sup> T cell population (left plots), and NK cell population (right plots). Numbers indicate the percentage of cells in the indicated gate.

### 340 *Other excluded reagents*

341 Other antibodies were also tested during the panel development process but were ultimately  
342 excluded from the final panel. CD122 was tested in the first panels but a constitutive expression  
343 across all NK cells was observed, which has led to its exclusion as it would not be informative to  
344 address NK cell activation. CD4 was also tested in the first panels to distinguish T cell subsets.  
345 However, as other markers to study NK cells were included, CD4 was finally removed from the  
346 panel. And lastly, as already mentioned, Tim3 and PD-1 were also investigated, but were removed  
347 due to impaired expression after collagenase-treatment, and absence of expression in the  
348 different tested samples for PD-1, respectively.

349

350 **4. Final remarks for this panel development:**

351

352 *Collagenase treatment*

353 Because this staining panel was designed to elucidate NK cell phenotype within tumor  
354 tissues and peripheral blood, one of the challenges was to verify that the expression of the  
355 markers used in the different iterations of the panel was not impaired during tissue dissociation.  
356 As shown in the **Online Figure 6**, the expression of each of the used markers in the optimized  
357 panel is not impaired by collagenase digestion.

358

**A. PBMC from healthy donor, Live, CD45<sup>+</sup> CD14<sup>-</sup> CD19<sup>-</sup> CD3<sup>+</sup> CD127<sup>+</sup> HLA-DR<sup>+</sup>**

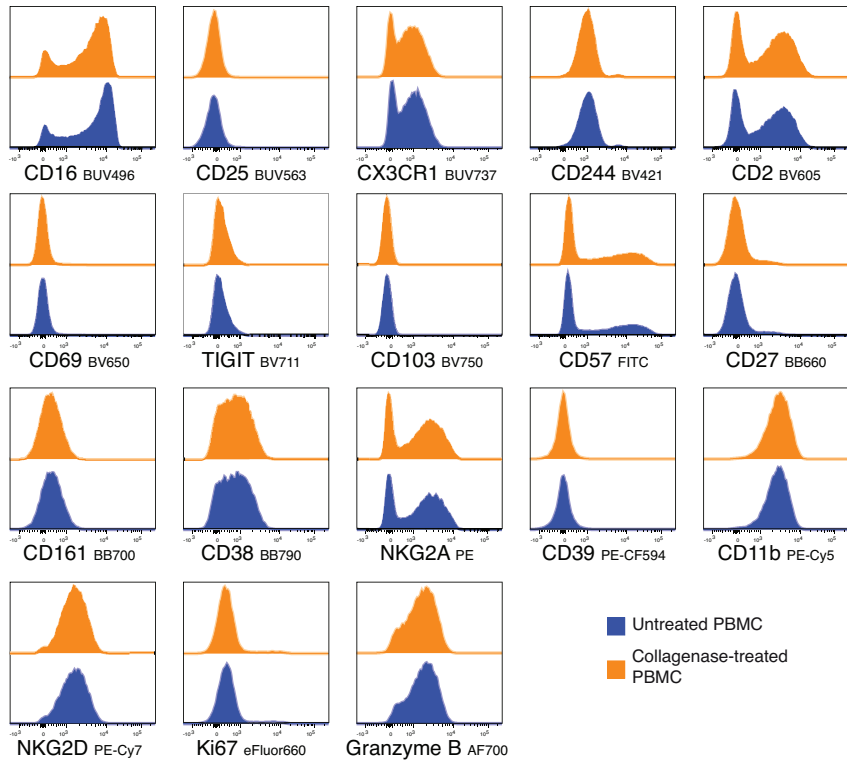

**B. PBMC from healthy donor, Live, CD45<sup>+</sup> CD14<sup>-</sup> CD19<sup>-</sup> CD3<sup>+</sup>**

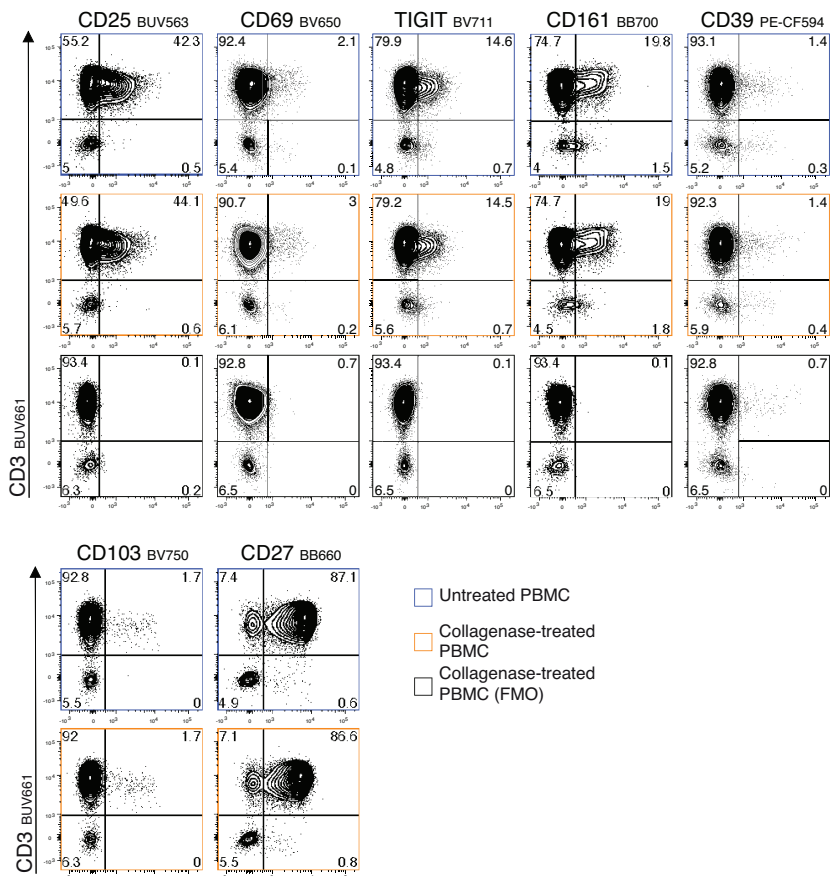

360 **Online Figure 6: Collagenase digestion did not alter other markers.**  
361 *PBMCs from one healthy donor were digested with type II collagenase. Histograms and dot plots are representing*  
362 *the expression of the markers used to define NK cell population in respectively the A. Lineage-gated NKp46<sup>+</sup> cells and*  
363 *B. Lineage-gated CD3<sup>+</sup> T cells. Numbers indicate the percentage of cells in the indicated gate.*  
364

365 *Fluorescence Minus One controls*

366 During panel development, Fluorescence Minus One (FMO) controls were used to exclude  
367 any unforeseen issues for all markers expressed at low levels. For the optimized panel, FMO  
368 controls should be used to determine gate placement of CD39, CD25, TIGIT, CD161 and CD56. If  
369 this panel is only used for NK cell characterization in the blood, CD69 FMO should also be added.  
370 Indeed, while the positive and negative population of CD69-expressing NK cells are clearly  
371 defined within infiltrated NK cells, the gate placement could be harder to set up in order to  
372 distinguish the CD69<sup>+</sup> from the CD69<sup>-</sup> population within circulating NK cells (**Online Figure 7**).

**A. Tumor tissue, Live, CD45<sup>+</sup> CD14<sup>-</sup> CD19<sup>-</sup> CD3<sup>+</sup> CD127<sup>+</sup> HLA-DR<sup>+</sup>**

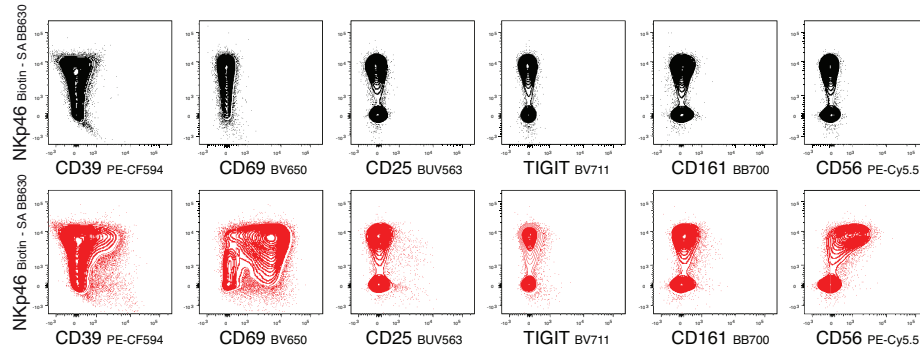

**B. PBMC from healthy donor, Live, CD45<sup>+</sup> CD14<sup>-</sup> CD19<sup>-</sup> CD3<sup>+</sup> CD127<sup>+</sup> HLA-DR<sup>+</sup>**

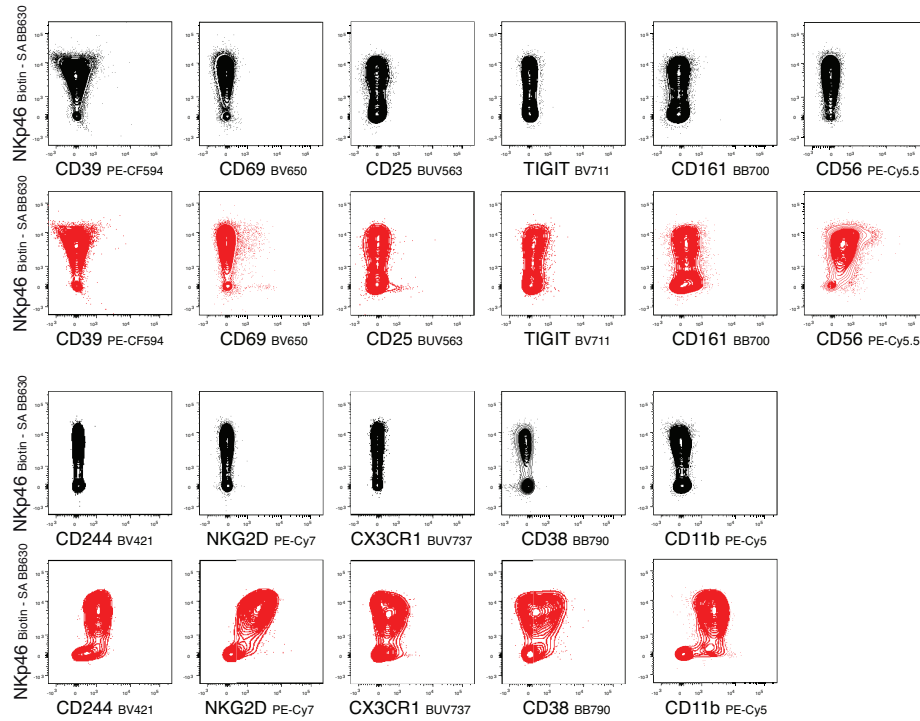

**C. Tumor tissue, Live, CD45<sup>+</sup> CD14<sup>-</sup> CD19<sup>-</sup> CD3<sup>+</sup>**

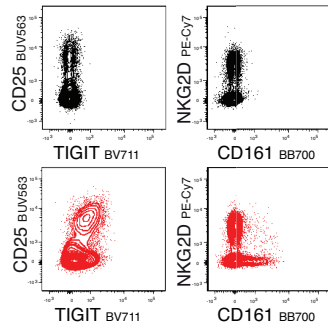

373  
374  
375  
376  
377  
378

**Online Figure 7: FMO from both blood and tissue.**

Single FMO controls were performed on **A. C.** two different tumor tissues **B.** PBMC from one healthy donor. In **A., B. and C.,** upper black dot plots represent the FMO expression and lower red dot plots represent the corresponding full staining for the lineage-gated **A. B.** NK cell population, and **C.** CD3<sup>+</sup> T cell population.

379 *Compensation*

380 For compensation, controls of single stain beads mouse, rat, and REA beads were stained  
381 with each appropriate monoclonal antibody depending on their host species or their provider.  
382 Specifically, here, REA beads were stained with NKG2A PE, rat beads were stained either with  
383 CX3CR1 BUV737 or Ki67 eFluor647, and mouse beads were stained with the other markers.  
384 Amine reactive beads were stained with LIVE/DEAD® Fixable Aqua Dead Cell Stain. As it has  
385 already been shown in a previously published OMIP, even after the generation of the  
386 compensation matrix using each single stain control, a few compensation issues were still  
387 observed and were consistent across every experiment (28). Noteworthy, the observed  
388 compensation issues were not deemed to be issues as they did not impact the accurate definition  
389 of cell population. However, if necessary, in order to correct the visual nuisance, these minor  
390 overcompensations can be fixed manually based on comparison to the respective FMO controls  
391 or using known marker biology and expression patterns. The three recurrent overcompensation  
392 were between CD27 BB660 and Ki67 R660; CD11b PE-Cy5 and CD16 BB660; CD56 PE-Cy5.5 and  
393 CD161 BB700.

394

395 *Empty channel*

396 For detection and exclusion of autofluorescent cells the V510 channel was left empty in  
397 this panel. Since the goal of this paper is to define NK cells isolated from tissues where  
398 background autofluorescence can be prominent, an empty channel will help to avoid staining  
399 issues by gating out autofluorescent events.

400



401 *Expected variability between individuals*

402 In order to provide an initial assessment of the potential expression variability of the  
403 different markers in our panel, we ran the final optimized panel on tumor tissue from four  
404 different donors as well as matched-peripheral blood. We quantified the frequency of each  
405 marker for two NK cell subsets: NKp46<sup>+</sup> CD16<sup>+</sup> and NKp46<sup>+</sup> CD16<sup>-</sup> subset (**Online Figure 8**). Our  
406 result showed that while some variability is observed across donors, the NK phenotype appears  
407 fairly consistent across these donors.

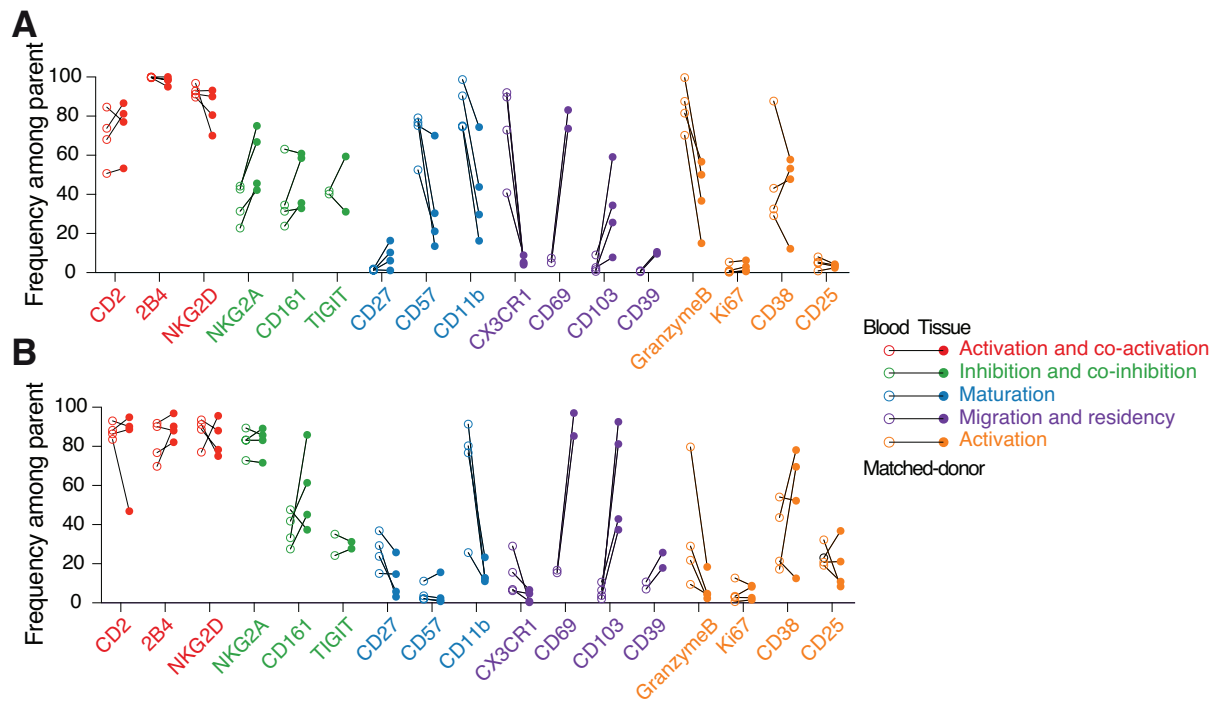

408  
409  
410  
411  
412  
413

**Online Figure 8: Variability of expression among donors**

The optimized panel was run on oral squamous cell carcinoma tissues from 4 donors as well as their matched-peripheral blood and the graphs depict the summary statistics for the frequency of the different markers among **A**. NKp46<sup>+</sup> CD16<sup>+</sup> and **B**. NKp46<sup>+</sup> CD16<sup>-</sup> NK cells. Blood and tissue from one donor are connected with a black line.

414 *What about T cells?*

415 While our panel has been designed to provide in-depth characterization of human NK  
416 cells isolated from tissue, it can also be used to assess expression of NK-associated markers by T  
417 cells (28,36-38) (**Online Figure 9**).

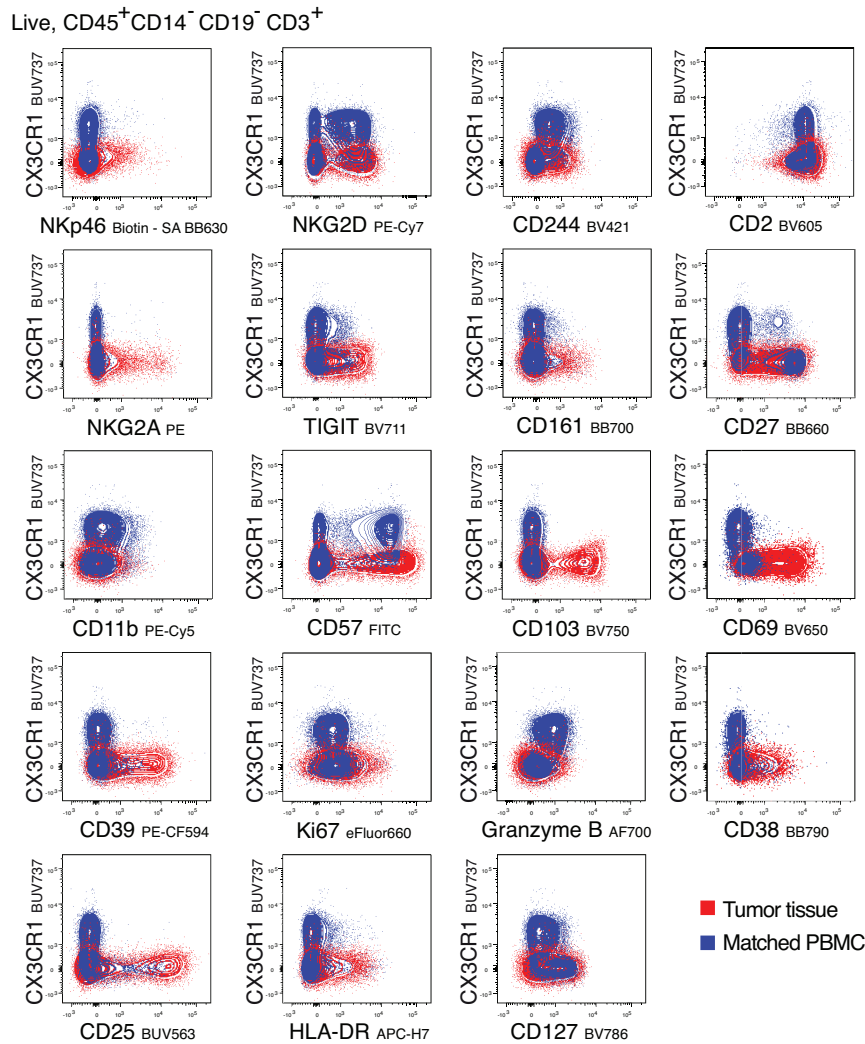

418 **Online Figure 9: Expression of the different markers among the CD3<sup>+</sup> T cell population**  
419 *Overview of the 20 phenotypic molecules analyzed within the CD3<sup>+</sup> T cell compartment of the tumor tissue (red) of a*  
420 *representative donor and its matched-peripheral blood (blue).*  
421  
422

## 423 **Material and Methods**

424

### 425 **1. Sample preparation**

426

427 This first section describes the material and method used to prepare single cell suspensions  
428 from cryopreserved PBMCs, fresh blood and tumor tissue.

429

#### 430 *Commercial reagents and materials*

- 431 ○ RPMI 1640 (Gibco #11875-093)
- 432 ○ Heat inactivated Fetal Calf Serum (FCS) (Gemini Benchmark #100-106)
- 433 ○ Penicillin-Streptomycin (Gibco #15140-163)
- 434 ○ L-glutamine (Gibco #35050-61)
- 435 ○ Collagenase type II (Sigma #C6885-1G)
- 436 ○ DNase 50U/μL (Sigma #D5025-375KU)
- 437 ○ Petri Dish (Corning #430167)
- 438 ○ Disposable scalpel
- 439 ○ Cell strainers, 70 μm (Falcon #352350)
- 440 ○ 30 cc syringe (BD #302833)
- 441 ○ 16-gauge blunt ended needle (Stem cell #28110)
- 442 ○ 50mL conical tubes
- 443 ○ Lymphoprep™ (StemCell #07851)
- 444 ○ 50 mL tube for density gradient centrifugation SepMate™ (StemCell #85450)

445

446 *Prepared Buffers*

447 R10 media: RPMI 1640 supplemented with 10% of FCS, 1% of L-glutamine, 1% of Penicillin-

448 Streptomycin

449 R7.5 media: RPMI 1640 supplemented with 7.5% of FCS, 1% of L-glutamine, 1% of Penicillin-

450 Streptomycin

451 Collagenase digestion media: in a 50 mL conical tube, warm up 25 mL of R7.5 media for 30

452 minutes in a 37°C water bath. Prior to the biopsy digestion, add 700 units/mL (number of mg

453 depends on lot) of collagenase type II (based on a titration that was shown to be optimal (39) as

454 well as 2  $\mu$ L / mL (100  $\mu$ L in 50 mL) of DNase to prevent cell clumping.

455

456 *Method*

457 Frozen PBMC:

458 - Thaw vial in a 37°C water bath

459 - Slowly dilute in warm R10 media

460 - Centrifuge at 250 *g* for 5 minutes

461 - Resuspend in warm R10 media

462 - Count cells

463

464 Blood processing:

465 - Centrifuge at 400 *g* for 10 minutes

466 - Remove plasma

- 467 - Complete to 35 mL with PBS
- 468 - Prepare a 50 mL SepMate™ tube containing 13 mL of Lymphoprep™
- 469 - Gently layer blood on top of Lymphoprep™
- 470 - Centrifuge at 1200 *g* for 16 minutes with brake off
- 471 - Harvest isolated mononuclear cells by pouring the upper layer in a new 50 mL tube
- 472 - Wash by adding R10 media
- 473 - Centrifuge at 250 *g* for 5 minutes
- 474 - Resuspend in R10 media
- 475 - Count cells
- 476
- 477 Tissue processing:
- 478 - Cut into smaller pieces with sterile scalpels
- 479 - Placed in 50 mL conical tube containing the collagenase digestion media
- 480 - Parafilm the lid
- 481 - Place tube for 30 minutes of incubation at 37°C with agitation (100-200 rpm)
- 482 - Remove from incubator and plunge (at least ten times) with 30 cc syringe and blunt 16-
- 483 gauge needle
- 484 - Pass through a 70 µm strainer into a new 50 ml conical tube and complete with fresh R10
- 485 media
- 486 - Centrifuge at 250 *g* for 5 minutes
- 487 - Resuspend in R10 media
- 488 - Count cells

489        **2. Staining protocol**

490

491        This second section describes the material and method used to stain the different isolated  
492 single cells.

493

494        *Commercial reagents and materials*

- 495        ○ Phosphate Buffered Saline PBS (Gibco #20012-027)
- 496        ○ Heat inactivated Fetal Calf Serum (FCS) (Gemini Benchmark #100-106)
- 497        ○ 96-well V-bottom plate
- 498        ○ Brilliant Staining buffer (BD #563794)
- 499        ○ UV Fixable Live/Dead Cell Staining (UV blue, Invitrogen #L34962)
- 500        ○ Fc-Block (BioLegend TruStain FcX #422303)
- 501        ○ CompBeads anti-rat (BD#552844), anti-mouse (BD #552843 and CompBeads Plus  
502 #560497), anti-REA (Miltenyi #130-104-693)
- 503        ○ ArC™ Amine Reactive Compensation Bead Kit (Thermo Fisher #A10346)
- 504        ○ Fixation/Dilution Kit: eBioscience™ Foxp3 Transcription Factor Staining Buffer Kit  
505 (ThermoFisher #00-5523-00)
- 506        ○ Deionized water (DI H<sub>2</sub>O)
- 507        ○ Antibodies used in this panel have been obtained from BD Biosciences, BioLegend,  
508 ThermoFisher or Miltenyi as listed in the **Online Table 2** along with the used titers

509

510 *Prepared Buffers*

511 Staining buffer: PBS supplemented with 2% of FCS

512 Fc-Block/Viability dye solution: add 25  $\mu$ L of Fc-Block and 1  $\mu$ L of reconstituted Live/Dead reagent  
513 to 500  $\mu$ L of PBS immediately prior to use. OMIP-44 has described that the presence of Fc-  
514 blocking reagent does not significantly impair the staining of dead cells (5).

515 Antibody staining mix: add the correct final dilutions of surface antibodies (except streptavidin)  
516 in brilliant staining buffer for a final volume of 50  $\mu$ L per staining.

517 CompBeads mixes: for anti-Rat and anti-REA compbeads, prepare the mixes by adding 1 drop of  
518 negative beads to 1 drop of positive beads for a final volume of 100  $\mu$ L. For anti-mouse  
519 CompBeads, mix 7 drops of the positive and the negative fraction of the CompBeads and  
520 CompBeads Plus and complete with 500  $\mu$ L of staining buffer for a final volume of 1.2 mL.

521 Streptavidin mix: add the correct final dilution of streptavidin BB630 in staining buffer

522 Fixation buffer: mix  $\frac{1}{4}$  of concentrate buffer in  $\frac{3}{4}$  of diluent buffer from the Fixation/Dilution Kit

523 Permeabilization buffer: mix 1/10 of Perm 1x buffer from the Fixation/Dilution Kit in DI H<sub>2</sub>O

524 Intranuclear staining mix: add the correct final dilutions of intracellular (Granzyme B) and  
525 intranuclear (Ki67) antibodies in the permeabilization buffer for a final volume of 50  $\mu$ L per  
526 staining

527

528 *Method*

529 1. Dispensing freshly isolated single cells

530 - Resuspend cells in the appropriate volume of PBS (Use each sample between  $2-5 \times 10^6$   
531 cells per staining)

- 532 - Dispense into a 96-well V-bottom plate (up to 300  $\mu$ L)
- 533 - Centrifuge plate at 250 *g* for 5 minutes
- 534 - Flick supernatant
- 535
- 536 2. Viability staining
- 537 - Resuspend each cell pellets in 100  $\mu$ L of freshly prepared Fc-Block/Viability solution. At
- 538 the same time, distribute one drop of the positive beads of the ArC™ compensation kit in
- 539 an empty well (about 50  $\mu$ L), and add 0.1  $\mu$ L of reconstituted Live/Dead reagent.
- 540 - Incubate for 15 minutes at room temperature (RT) in the dark (or protect plate with
- 541 aluminum foil).
- 542 - Wash by resuspending in 200  $\mu$ L of staining buffer
- 543 - Centrifuge at 700 *g* for 1 minute.
- 544 - Flick supernatant
- 545 - Add one drop of the negative beads of the ArC™ compensation kit to well containing the
- 546 positive beads.
- 547
- 548 3. Surface staining
- 549 - Resuspend each cell pellets in 50  $\mu$ L of antibody staining mix
- 550 - Incubate 20 minutes at RT in the dark
- 551 - In parallel, dispense 50  $\mu$ L of the different CompBeads mixes and add 0.7  $\mu$ L of a single
- 552 antibody into each well (0.7  $\mu$ L is a sufficient quantity for saturating all binding sites on
- 553 the antibody capture beads for our antibodies and leads to a signal stain as bright or



554 brighter compared to our experimental samples (data not shown)). Mix and incubate for  
555 a minimum of 15 minutes at RT in the dark.

556 - Wash by resuspending each cell pellets in 200  $\mu$ L of staining buffer

557 - Centrifuge at 700 *g* for 1 minute.

558 - Flick supernatant

559 - Resuspend in 200  $\mu$ L of staining buffer

560 - Centrifuge at 700 *g* for 1 minute.

561 - Flick supernatant

562

563 4. Cytoplasmic and nuclear staining

564 - Fix cells by resuspending each cell pellets in 150  $\mu$ L of fixation buffer (same for sample  
565 and beads)

566 - Incubate 40 minutes at 4°C

567 - Resuspend in 150  $\mu$ L of permeabilization buffer (same for sample and beads)

568 - Centrifuge at 700 *g* for 1 minute

569 - Flick supernatant

570 - Resuspend in 150  $\mu$ L of permeabilization buffer (same for sample and beads)

571 - Centrifuge at 700 *g* for 1 minute

572 - Flick supernatant

573 - Resuspend samples in 50  $\mu$ L of intranuclear staining mix and resuspend beads in 50  $\mu$ L of  
574 permeabilization buffer.

575 - Incubate 30 minutes at RT in the dark

- 576 - Add 150  $\mu$ L of permeabilization buffer (same for sample and beads)
- 577 - Centrifuge at 700 *g* for 1 minute
- 578 - Flick supernatant
- 579 - Resuspend in 150  $\mu$ L of permeabilization buffer (same for sample and beads)
- 580 - Centrifuge at 700 *g* for 1 minute
- 581 - Flick supernatant
- 582 - Resuspend the cells and beads in 100 – 200  $\mu$ L of staining buffer and keep wrapped in
- 583 aluminum foil at 4°C until acquisition (Samples are acquired between 0 to 5 days after
- 584 staining. These different timing of acquisition do not affect the staining intensity of the
- 585 fluorochromes (**Online Figure 10**).

586

587 5. Acquire samples on FACSymphony A5

588 Photomultiplier tube (PMT) voltages were based on prior optimization using voltage

589 titration experiments (5). Each optimized PMT voltage has been assigned to a median

590 fluorescent intensity (MFI) target value based on the peak three, four or five of Ultra Rainbow

591 Particles (Spherotech). These target values were used to calibrate PMT voltages for day-to-

592 day instrument variation (3,40).

593

594

595

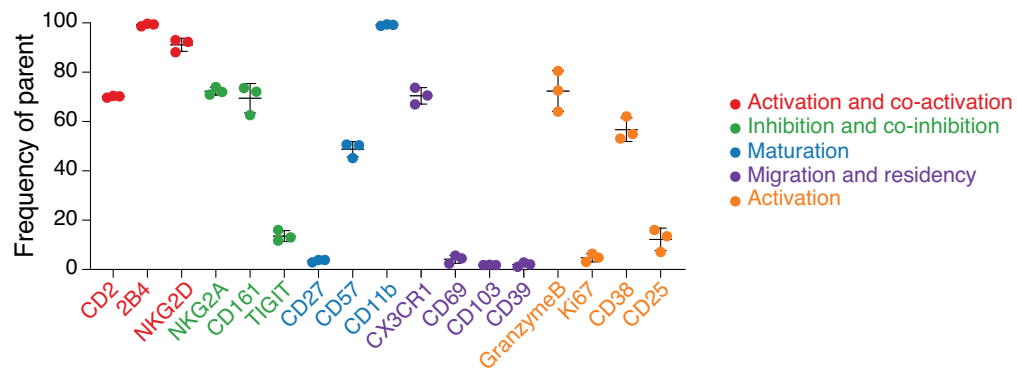

596

597 **Online Figure 10: Reproducibility of the panel**

598 Graph showing the frequency of the different markers among NKp46<sup>+</sup> cells (based on the gating strategy depicted in  
 599 main Figure 1) for PBMC of one healthy donor stained with the 27-color panel and acquired on the FACSymphony A5  
 600 after 0 – 5 days of staining.

601

602

## 603 References

604

- 605 1. Perfetto SP, Chattopadhyay PK, Lamoreaux L, Nguyen R, Ambrozak D, Koup RA, Roederer  
606 M. Amine-reactive dyes for dead cell discrimination in fixed samples. *Curr Protoc Cytom*  
607 2010;Chapter 9:Unit 9 34.
- 608 2. Mahnke YD, Roederer M. Optimizing a multicolor immunophenotyping assay. *Clin Lab*  
609 *Med* 2007;27:469-85, v.
- 610 3. Mair F, Tyznik AJ. High-Dimensional Immunophenotyping with Fluorescence-Based  
611 Cytometry: A Practical Guidebook. *Methods Mol Biol* 2019;2032:1-29.
- 612 4. Nguyen R, Perfetto S, Mahnke YD, Chattopadhyay P, Roederer M. Quantifying spillover  
613 spreading for comparing instrument performance and aiding in multicolor panel design.  
614 *Cytometry A* 2013;83:306-15.
- 615 5. Mair F, Prlic M. OMIP-044: 28-color immunophenotyping of the human dendritic cell  
616 compartment. *Cytometry A* 2018;93:402-405.
- 617 6. Walzer T, Jaeger S, Chaix J, Vivier E. Natural killer cells: from CD3(-)NKp46(+) to post-  
618 genomics meta-analyses. *Curr Opin Immunol* 2007;19:365-72.
- 619 7. Caligiuri MA. Human natural killer cells. *Blood* 2008;112:461-9.
- 620 8. Shemer-Avni Y, Kundu K, Shemesh A, Brusilovsky M, Yossef R, Meshesha M, Solomon-  
621 Alemayehu S, Levin S, Gershoni-Yahalom O, Campbell KS and others. Expression of NKp46  
622 Splice Variants in Nasal Lavage Following Respiratory Viral Infection: Domain 1-Negative  
623 Isoforms Predominate and Manifest Higher Activity. *Front Immunol* 2017;8:161.

- 624 9. Barrow AD, Edeling MA, Trifonov V, Luo J, Goyal P, Bohl B, Bando JK, Kim AH, Walker J,  
625 Andahazy M and others. Natural Killer Cells Control Tumor Growth by Sensing a Growth  
626 Factor. *Cell* 2018;172:534-548 e19.
- 627 10. Agresta L, Hoebe KHN, Janssen EM. The Emerging Role of CD244 Signaling in Immune Cells  
628 of the Tumor Microenvironment. *Front Immunol* 2018;9:2809.
- 629 11. Liu LL, Landskron J, Ask EH, Enqvist M, Sohlberg E, Traherne JA, Hammer Q, Goodridge JP,  
630 Larsson S, Jayaraman J and others. Critical Role of CD2 Co-stimulation in Adaptive Natural  
631 Killer Cell Responses Revealed in NKG2C-Deficient Humans. *Cell Rep* 2016;15:1088-1099.
- 632 12. Geary CD, Sun JC. Memory responses of natural killer cells. *Semin Immunol* 2017;31:11-  
633 19.
- 634 13. Hammer Q, Romagnani C. OMIP-039: Detection and analysis of human adaptive NKG2C(+)  
635 natural killer cells. *Cytometry A* 2017;91:997-1000.
- 636 14. Bjorkstrom NK, Riese P, Heuts F, Andersson S, Fauriat C, Ivarsson MA, Bjorklund AT,  
637 Flodstrom-Tullberg M, Michaelsson J, Rottenberg ME and others. Expression patterns of  
638 NKG2A, KIR, and CD57 define a process of CD56dim NK-cell differentiation uncoupled  
639 from NK-cell education. *Blood* 2010;116:3853-64.
- 640 15. Lazetic S, Chang C, Houchins JP, Lanier LL, Phillips JH. Human natural killer cell receptors  
641 involved in MHC class I recognition are disulfide-linked heterodimers of CD94 and NKG2  
642 subunits. *J Immunol* 1996;157:4741-5.
- 643 16. Kurioka A, Cosgrove C, Simoni Y, van Wilgenburg B, Geremia A, Bjorkander S, Sverremark-  
644 Ekstrom E, Thurnheer C, Gunthard HF, Khanna N and others. CD161 Defines a Functionally  
645 Distinct Subset of Pro-Inflammatory Natural Killer Cells. *Front Immunol* 2018;9:486.

- 646 17. Stanietsky N, Simic H, Arapovic J, Toporik A, Levy O, Novik A, Levine Z, Beiman M, Dassa  
647 L, Achdout H and others. The interaction of TIGIT with PVR and PVRL2 inhibits human NK  
648 cell cytotoxicity. *Proc Natl Acad Sci U S A* 2009;106:17858-63.
- 649 18. Sun H, Sun C. The Rise of NK Cell Checkpoints as Promising Therapeutic Targets in Cancer  
650 Immunotherapy. *Front Immunol* 2019;10:2354.
- 651 19. Judge SJ, Dunai C, Aguilar EG, Vick SC, Sturgill IR, Khuat LT, Stoffel KM, Van Dyke J, Longo  
652 DL, Darrow MA and others. Minimal PD-1 expression in mouse and human NK cells under  
653 diverse conditions. *J Clin Invest* 2020.
- 654 20. Del Zotto G, Antonini F, Pesce S, Moretta F, Moretta L, Marcenaro E. Comprehensive  
655 Phenotyping of Human PB NK Cells by Flow Cytometry. *Cytometry A* 2020.
- 656 21. Hayakawa Y, Smyth MJ. CD27 dissects mature NK cells into two subsets with distinct  
657 responsiveness and migratory capacity. *J Immunol* 2006;176:1517-24.
- 658 22. Van Acker HH, Capsomidis A, Smits EL, Van Tendeloo VF. CD56 in the Immune System:  
659 More Than a Marker for Cytotoxicity? *Front Immunol* 2017;8:892.
- 660 23. Leong JW, Chase JM, Romee R, Schneider SE, Sullivan RP, Cooper MA, Fehniger TA.  
661 Preactivation with IL-12, IL-15, and IL-18 induces CD25 and a functional high-affinity IL-2  
662 receptor on human cytokine-induced memory-like natural killer cells. *Biol Blood Marrow*  
663 *Transplant* 2014;20:463-73.
- 664 24. Lusty E, Poznanski SM, Kwofie K, Mandur TS, Lee DA, Richards CD, Ashkar AA. IL-18/IL-  
665 15/IL-12 synergy induces elevated and prolonged IFN-gamma production by ex vivo  
666 expanded NK cells which is not due to enhanced STAT4 activation. *Mol Immunol*  
667 2017;88:138-147.

- 668 25. Pahl JHW, Koch J, Gotz JJ, Arnold A, Reusch U, Gantke T, Rajkovic E, Treder M, Cerwenka  
669 A. CD16A Activation of NK Cells Promotes NK Cell Proliferation and Memory-Like  
670 Cytotoxicity against Cancer Cells. *Cancer Immunol Res* 2018;6:517-527.
- 671 26. Sabry M, Zubiak A, Hood SP, Simmonds P, Arellano-Ballester H, Cournoyer E, Mashar M,  
672 Pockley AG, Lowdell MW. Tumor- and cytokine-primed human natural killer cells exhibit  
673 distinct phenotypic and transcriptional signatures. *PLoS One* 2019;14:e0218674.
- 674 27. Le Gars M. SC, Kay A. W., Bayless N. L., Sola E., Starosvetsky E. , Moore L. , Shen-Orr S. S.  
675 , Aziz N. , Khatri P. , Dekker C. L., Swan G. E., Davis M. M. , Holmes S. , Blish C. A. . CD38  
676 contributes to human natural killer cell responses through a role in immune synapse  
677 formation. *bioRxiv* 2019.
- 678 28. Liechti T, Roederer M. OMIP-060: 30-Parameter Flow Cytometry Panel to Assess T Cell  
679 Effector Functions and Regulatory T Cells. *Cytometry A* 2019;95:1129-1134.
- 680 29. Woodward Davis AS, Roozen HN, Dufort MJ, DeBerg HA, Delaney MA, Mair F, Erickson JR,  
681 Slichter CK, Berkson JD, Klock AM and others. The human tissue-resident CCR5(+) T cell  
682 compartment maintains protective and functional properties during inflammation. *Sci*  
683 *Transl Med* 2019;11.
- 684 30. Lugthart G, Melsen JE, Vervat C, van Ostaijen-Ten Dam MM, Corver WE, Roelen DL, van  
685 Bergen J, van Tol MJ, Lankester AC, Schilham MW. Human Lymphoid Tissues Harbor a  
686 Distinct CD69+CXCR6+ NK Cell Population. *J Immunol* 2016;197:78-84.
- 687 31. Spits H, Bernink JH, Lanier L. NK cells and type 1 innate lymphoid cells: partners in host  
688 defense. *Nat Immunol* 2016;17:758-64.

- 689 32. Rebuli ME, Pawlak EA, Walsh D, Martin EM, Jaspers I. Distinguishing Human Peripheral  
690 Blood NK Cells from CD56(dim)CD16(dim)CD69(+)CD103(+) Resident Nasal Mucosal  
691 Lavage Fluid Cells. *Sci Rep* 2018;8:3394.
- 692 33. Castriconi R, Dondero A, Bellora F, Moretta L, Castellano A, Locatelli F, Corrias MV,  
693 Moretta A, Bottino C. Neuroblastoma-derived TGF-beta1 modulates the chemokine  
694 receptor repertoire of human resting NK cells. *J Immunol* 2013;190:5321-8.
- 695 34. Regis S, Caliendo F, Dondero A, Casu B, Romano F, Loiacono F, Moretta A, Bottino C,  
696 Castriconi R. TGF-beta1 Downregulates the Expression of CX3CR1 by Inducing miR-27a-5p  
697 in Primary Human NK Cells. *Front Immunol* 2017;8:868.
- 698 35. Simoni Y, Becht E, Fehlings M, Loh CY, Koo SL, Teng KWW, Yeong JPS, Nahar R, Zhang T,  
699 Kared H and others. Bystander CD8(+) T cells are abundant and phenotypically distinct in  
700 human tumour infiltrates. *Nature* 2018;557:575-579.
- 701 36. Lal KG, Leeansyah E, Sandberg JK, Eller MA. OMIP-046: Characterization of invariant T cell  
702 subset activation in humans. *Cytometry A* 2018;93:499-503.
- 703 37. Nettey L, Giles AJ, Chattopadhyay PK. OMIP-050: A 28-color/30-parameter Fluorescence  
704 Flow Cytometry Panel to Enumerate and Characterize Cells Expressing a Wide Array of  
705 Immune Checkpoint Molecules. *Cytometry A* 2018;93:1094-1096.
- 706 38. Liechti T, Roederer M. OMIP-058: 30-Parameter Flow Cytometry Panel to Characterize  
707 iNKT, NK, Unconventional and Conventional T Cells. *Cytometry A* 2019;95:946-951.
- 708 39. McKinnon LR, Hughes SM, De Rosa SC, Martinson JA, Plants J, Brady KE, Gumbi PP, Adams  
709 DJ, Vojtech L, Galloway CG and others. Optimizing viable leukocyte sampling from the



710 female genital tract for clinical trials: an international multi-site study. PLoS One  
711 2014;9:e85675.

712 40. Perfetto SP, Ambrozak D, Nguyen R, Chattopadhyay PK, Roederer M. Quality assurance  
713 for polychromatic flow cytometry using a suite of calibration beads. Nat Protoc  
714 2012;7:2067-79.

715
